# Supplementary material for: Electrochemotherapy in Treatment of Canine Oral Malignant Melanoma and Factors Influencing Treatment Outcome
Source: PubMed Central journal article supplement — Radiol Oncol. 2020 Mar 7;54(1):68–78. doi: 10.2478/raon-2020-0014 (PMC7087426; doi:10.2478/raon-2020-0014), 2020-03-07
Supplement: raon-54-068_sm.pdf [file raon-54-068_sm.pdf]

# Electrochemotherapy in treatment of canine oral malignant melanoma and factors influencing treatment outcome

Matías Nicolás Tellado, Felipe Horacio Maglietti, Sebastián Diego Michinski, Guillermo Ricardo Marshall, Emanuela Signori

doi: 10.2478/raon-2020-0014

SUPPLEMENTARY TABLE 1. List of patients

| Patient | Sex | Breed            | Age (yrs) | Weight (kg) | Stage | Response | Survival(months) | Bone involvement | Location | number of ECT | cause of death        | Developed new r/Mts at present | Histological subtype |             |
|---------|-----|------------------|-----------|-------------|-------|----------|------------------|------------------|----------|---------------|-----------------------|--------------------------------|----------------------|-------------|
| 1       | M   | labrador         | 12        | 45          | II    | PR       | 7                | yes              | Rostral  | 1             | Euth./ Local Prog no  | no                             | ?                    |             |
| 2       | F   | puddle           | 11        | 12          | II    | PR       | 5                | yes              | Rostral  | 1             | Euth./ Local Prog no  | no                             | Epithelioid          |             |
| 3       | M   | labrador         | 13        | 28          | III   | SD       | 4                | yes              | Rostral  | 2             | Euth./ Local Prog no  | no                             | Epithelioid          |             |
| 4       | F   | crossbreed       | 15        | 13          | III   | PR       | 8                | yes              | Rostral  | 1             | Euth./ Local Prog no  | lymph node                     | Anaplastic           |             |
| 5       | M   | golden retriever | 10        | 33          | III   | CR       | 6                | yes              | Caudal   | 1             | Euth./ Local Prog no  | no                             | Mixed                |             |
| 6       | M   | crossbreed       | 11        | 22          | II    | CR       | 9                | No               | Rostral  | 1             | Euth./ Local Prog no  | no                             | Epithelioid          |             |
| 7       | M   | pequingese       | 14        | 4           | I     | PR       | 10               | ?                | Rostral  | 2             | ?                     | no                             | ?                    |             |
| 8       | F   | crossbreed       | 14        | 11          | III   | SD       | 6                | yes              | Caudal   | 2             | Euth./ Local Prog no  | lymph node                     | Fusocelular          |             |
| 9       | F   | crossbreed       | 15        | 20          | II    | CR       | 8                | yes              | Rostral  | 1             | Euth./ Local Prog no  | no                             | Epithelioid          |             |
| 10      | M   | puddle           | 12        | 7           | III   | PD       | 3                | yes              | Caudal   | 1             | Euth./ Local Prog no  | no                             | Mixed                |             |
| 11      | F   | crossbreed       | 14        | 15          | II    | PR       | 6                | yes              | Caudal   | 2             | Euth./Metastases yes  | no                             | Fusocelular          |             |
| 12      | F   | beagle           | 10        | 12,25       | III   | PR       | 9                | yes              | Caudal   | 2             | ?                     | no                             | lymph node           | Mixed       |
| 13      | M   | cocker           | 11        | 12          | I     | CR       | 25               | No               | Rostral  | 2             | Unrelated             | no                             | no                   | Epithelioid |
| 14      | F   | crossbreed       | 13        | 4           | II    | CR       | 7                | yes              | Caudal   | 2             | Euth./Metastases yes  | yes                            | Mixed                |             |
| 15      | M   | crossbreed       | 10        | 11          | IV    | PR       | 4                | yes              | Caudal   | 1             | Euth./ Local Prog no  | yes                            | Fusocelular          |             |
| 16      | F   | crossbreed       | 11        | 26          | II    | PR       | 9                | yes              | Caudal   | 1             | Euth./ Local Prog no  | no                             | ?                    |             |
| 17      | F   | crossbreed       | 13        | 20          | III   | PR       | 6                | yes              | Rostral  | 2             | Euth./ Local Prog no  | no                             | Mixed                |             |
| 18      | F   | rottweiler       | 11        | 38          | II    | PR       | 11               | No               | Rostral  | 2             | Euth./ Local Prog yes | no                             | Fusocelular          |             |
| 19      | F   | beagle           | 11        | 16          | III   | PR       | 9                | yes              | Caudal   | 2             | Euth./ Local Prog no  | lymph node                     | Anaplastic           |             |
| 20      | M   | labrador         | 12        | 37          | II    | PR       | 9                | yes              | Caudal   | 3             | Euth./Metastases yes  | no                             | Anaplastic           |             |
| 21      | F   | crossbreed       | 13        | 18          | IV    | SD       | 6                | yes              | Rostral  | 3             | Euth./ Local Prog no  | yes                            | Fusocelular          |             |
| 22      | M   | labrador         | 12        | 35          | IV    | PR       | 2                | yes              | Caudal   | 1             | Euth./Metastases yes  | yes                            | Anaplastic           |             |
| 23      | M   | golden retriever | 11        | 34          | IV    | PD       | 7                | yes              | Caudal   | 1             | Euth./Metastases yes  | yes                            | Anaplastic           |             |
| 24      | M   | cocker           | 9         | 16          | III   | PR       | 17               | No               | Rostral  | 2             | Euth./ Local Prog ?   | lymph node                     | Epithelioid          |             |
| 25      | M   | crossbreed       | 10        | 23          | IV    | SD       | 5                | yes              | Rostral  | 1             | Euth./Metastases ?    | yes                            | ?                    |             |
| 26      | M   | labrador         | 6         | 32          | I     | PR       | 15               | ?                | Rostral  | 2             | Euth./ Local Prog no  | no                             | ?                    |             |
| 27      | M   | crossbreed       | 8         | 9           | II    | PR       | 9                | yes              | Rostral  | 1             | Alive                 | no                             | no                   | Epithelioid |
| 28      | M   | chou chou        | 7         | 27,5        | I     | CR       | 10               | No               | Caudal   | 1             | Unrelated             | no                             | no                   | Epithelioid |
| 29      | M   | crossbreed       | 15        | 12,5        | III   | PR       | 12               | yes              | Caudal   | 2             | Euth./Metastases yes  | no                             | Epithelioid          |             |
| 30      | F   | crossbreed       | 12        | 25          | III   | PR       | 7                | yes              | Rostral  | 1             | Euth./ Local Prog no  | lymph node                     | Mixed                |             |
| 31      | F   | puddle           | 10        | 4           | III   | PR       | 6                | yes              | Rostral  | 1             | Euth./ Local Prog no  | no                             | Mixed                |             |
| 32      | F   | rottweiler       | 10        | 38          | II    | PR       | 9                | yes              | Rostral  | 1             | Euth./ Local Prog no  | no                             | Mixed                |             |
| 33      | F   | sharpei          | 10        | 20          | IV    | PD       | 4                | yes              | Rostral  | 1             | Euth./Metastases yes  | yes                            | Fusocelular          |             |
| 34      | F   | doberman         | 13        | 29          | I     | CR       | 18               | yes              | Rostral  | 1             | Unrelated             | no                             | no                   | Fusocelular |
| 35      | F   | crossbreed       | 13        | 10          | II    | PR       | 10               | No               | Caudal   | 2             | Euth./ Local Prog no  | no                             | Epithelioid          |             |
| 36      | F   | labrador         | 14        | 28          | IV    | PD       | 5                | ?                | Rostral  | 3             | Euth./ Local Prog yes | no                             | Epithelioid          |             |
| 37      | F   | dogo             | 13        | 34          | III   | PD       | 8                | yes              | Rostral  | 2             | Euth./Metastases yes  | no                             | Fusocelular          |             |
| 38      | M   | beagle           | 13        | 10          | III   | PR       | 4                | yes              | Caudal   | 1             | Euth./ Local Prog no  | lymph node                     | Anaplastic           |             |
| 39      | M   | basset hound     | 15        | 22          | IV    | PR       | 4                | yes              | Caudal   | 2             | Unrelated             | yes                            | yes                  | Epithelioid |
| 40      | F   | labrador         | 11        | 30          | III   | SD       | 6                | yes              | Caudal   | 1             | Euth./ Local Prog no  | no                             | Mixed                |             |
| 41      | F   | doberman         | 8         | 28          | II    | PR       | 11               | yes              | Caudal   | 3             | Euth./Metastases yes  | no                             | Fusocelular          |             |
| 42      | F   | crossbreed       | 8         | 11          | I     | PR       | 11               | yes              | Rostral  | 3             | Euth./ Local Prog yes | no                             | Anaplastic           |             |
| 43      | F   | crossbreed       | 16        | 16          | I     | CR       | 12               | No               | Rostral  | 1             | Euth./ Local Prog no  | no                             | Mixed                |             |
| 44      | M   | crossbreed       | 13        | 40          | III   | SD       | 5                | yes              | Caudal   | 1             | Euth./ Local Prog no  | no                             | ?                    |             |
| 45      | F   | sharpei          | 9         | 28          | III   | SD       | 5                | No               | Caudal   | 1             | Euth./Metastases no   | lymph node                     | Fusocelular          |             |
| 46      | F   | crossbreed       | 13        | 9           | I     | PD       | 4                | yes              | Caudal   | 1             | Euth./ Local Prog no  | no                             | ?                    |             |
| 47      | M   | crossbreed       | 9         | 13          | II    | PR       | 7                | No               | Caudal   | 2             | Euth./Metastases yes  | no                             | Epithelioid          |             |
| 48      | M   | crossbreed       | 13        | 18          | III   | SD       | 9                | yes              | Rostral  | 1             | Euth./ Local Prog no  | no                             | Fusocelular          |             |
| 49      | M   | labrador         | 11        | 40          | I     | CR       | 4                | No               | Rostral  | 1             | Alive                 | no                             | no                   | Fusocelular |
| 50      | M   | cocker           | 13        | 15          | II    | PR       | 9                | yes              | Rostral  | 1             | Euth./Metastases yes  | no                             | Anaplastic           |             |
| 51      | M   | labrador         | 13        | 50          | IV    | SD       | 3                | yes              | Caudal   | 1             | Euth./ Local Prog no  | yes                            | Fusocelular          |             |
| 52      | F   | english mastiff  | 8         | 58          | IV    | PR       | 6                | yes              | Rostral  | 1             | Euth./Metastases yes  | lymph node                     | Fusocelular          |             |
| 53      | M   | cocker           | 15        | 13          | II    | CR       | 21               | No               | Rostral  | 1             | Unrelated             | no                             | no                   | Fusocelular |
| 54      | M   | cocker           | 15        | 13          | II    | PR       | 11               | No               | Rostral  | 1             | Unrelated             | no                             | no                   | Fusocelular |
| 55      | M   | golden retriever | 12        | 30          | II    | PR       | 7                | No               | Rostral  | 1             | Euth./Metastases yes  | yes                            | Epithelioid          |             |
| 56      | M   | rottweiler       | 9         | 40          | III   | PD       | 6                | yes              | Caudal   | 2             | Euth./ Local Prog no  | no                             | Mixed                |             |
| 57      | F   | beagle           | 10        | 16          | III   | SD       | 6                | No               | Caudal   | 1             | Euth./Metastases yes  | lymph node                     | Mixed                |             |
| 58      | M   | golden retriever | 9         | 29          | I     | CR       | 30               | No               | Caudal   | 1             | ?                     | no                             | no                   | Epithelioid |
| 59      | M   | golden retriever | 9         | 29          | I     | CR       | 29               | no               | Caudal   | 1             | ?                     | no                             | no                   | Epithelioid |
| 60      | F   | golden retriever | 12        | 28          | II    | PD       | 4                | yes              | Caudal   | 1             | Euth./ Local Prog no  | no                             | Mixed                |             |
| 61      | M   | crossbreed       | 16        | ?           | II    | CR       | 17               | No               | Rostral  | 1             | Euth./ Local Prog no  | no                             | Mixed                |             |
| 62      | M   | dalmata          | 11        | 30          | III   | PR       | 8                | No               | Rostral  | 2             | Euth./Metastases no   | lymph node                     | Mixed                |             |
| 63      | M   | cocker           | 12        | 15          | II    | PR       | 15               | No               | Rostral  | 1             | Unrelated             | no                             | no                   | Mixed       |
| 64      | M   | crossbreed       | 13        | 23          | IV    | SD       | 3                | yes              | Caudal   | 1             | Euth./Metastases no   | no                             | Anaplastic           |             |
| 65      | M   | cocker           | 13        | 16          | I     | CR       | 19               | No               | Rostral  | 1             | Unrelated             | no                             | no                   | Epithelioid |
| 66      | F   | puddle           | 15        | 3,5         | I     | PR       | 7                | No               | Rostral  | 2             | Unrelated             | no                             | no                   | Fusocelular |
| 67      | M   | crossbreed       | 11        | 25          | II    | PD       | 11               | yes              | Caudal   | 4             | Euth./Metastases yes  | no                             | Mixed                |             |

SUPPLEMENTARY TABLE 2. Questionnaire for Quality of Life Evaluation

Date:

Name of the patient:

Name of the owner

Please, read carefully and complete the following questionnaire regarding your pet.

It is composed by 4 different behavioral and clinical categories:

1. Oral pain vocalization
2. Degree of depression
3. Changes in activity level
4. Degree of bleeding

Please mark the most suitable option:

|                                                                                       |   |
|---------------------------------------------------------------------------------------|---|
| • Oral Pain/degree of food intake                                                     |   |
| Never cries out, eating and drinking as usual                                         | 0 |
| Rarely cries out in pain when eating or drinking                                      | 1 |
| Occasionally cries out in pain when eating or occasionally refuses eating or drinking | 2 |
| Always cries out in pain when eating or completely refuses food or water intake       | 3 |
| • Changes in activity level                                                           |   |
| Normal                                                                                | 0 |
| Small decrease in activity level                                                      | 1 |
| Significant decrease in activity level                                                | 2 |
| Does not perform any activity                                                         | 3 |
| • Degree of bleeding                                                                  |   |
| No bleeding                                                                           | 0 |
| Occasional oral bleeding                                                              | 1 |
| Occasional Oral and nasal bleeding                                                    | 2 |
| Frequently Bleeding                                                                   | 3 |

Feel free to add any relevant information in the following section.

Observations and comments:
